# Supplementary material for: Novel diol functionalized dicationic ionic liquids: synthesis, characterization and DFT calculations on H-bonding influence on thermophysical properties
Source: Royal Society of Chemistry journal article supplement (doi:10.1039/c6ra17188e), 2016-01-01
Supplement: c6ra17188e1.pdf [file c6ra17188e1.pdf]

## Supporting Information

### **Novel diol functionalized dicationic ionic liquids: Synthesis, characterization and DFT calculations on H-bonding influence on thermophysical properties**

**Reza Fareghi - Alamdari<sup>\*a</sup>, Razieh Hatefipour<sup>a</sup>, Mehdi Rakhshi<sup>b</sup>, Negar Zekri<sup>a</sup>**

<sup>a</sup> *Faculty of Chemistry and Chemical Engineering, Malek - Ashtar University of Technology, Tehran, I.R.Iran.*

<sup>b</sup> *Department of Chemistry, University of Kashan, Kashan, I.R.Iran.*

---

\* Corresponding authors: Fax: +98-21-77074772; Tel: +98-935-5999011.  
E-mail: reza\_fareghi@yahoo.com

1) FT-IR,  $^1\text{H}$ NMR,  $^{13}\text{C}$ -NMR spectrums for 2,2-Bis(1-(1-methylimidazolium)methylpropane-1,3-diol bromide [ $\text{mim}_2\text{C}_3(\text{C}_1\text{OH})_2$ ][Br] $_2$  (**1a**))

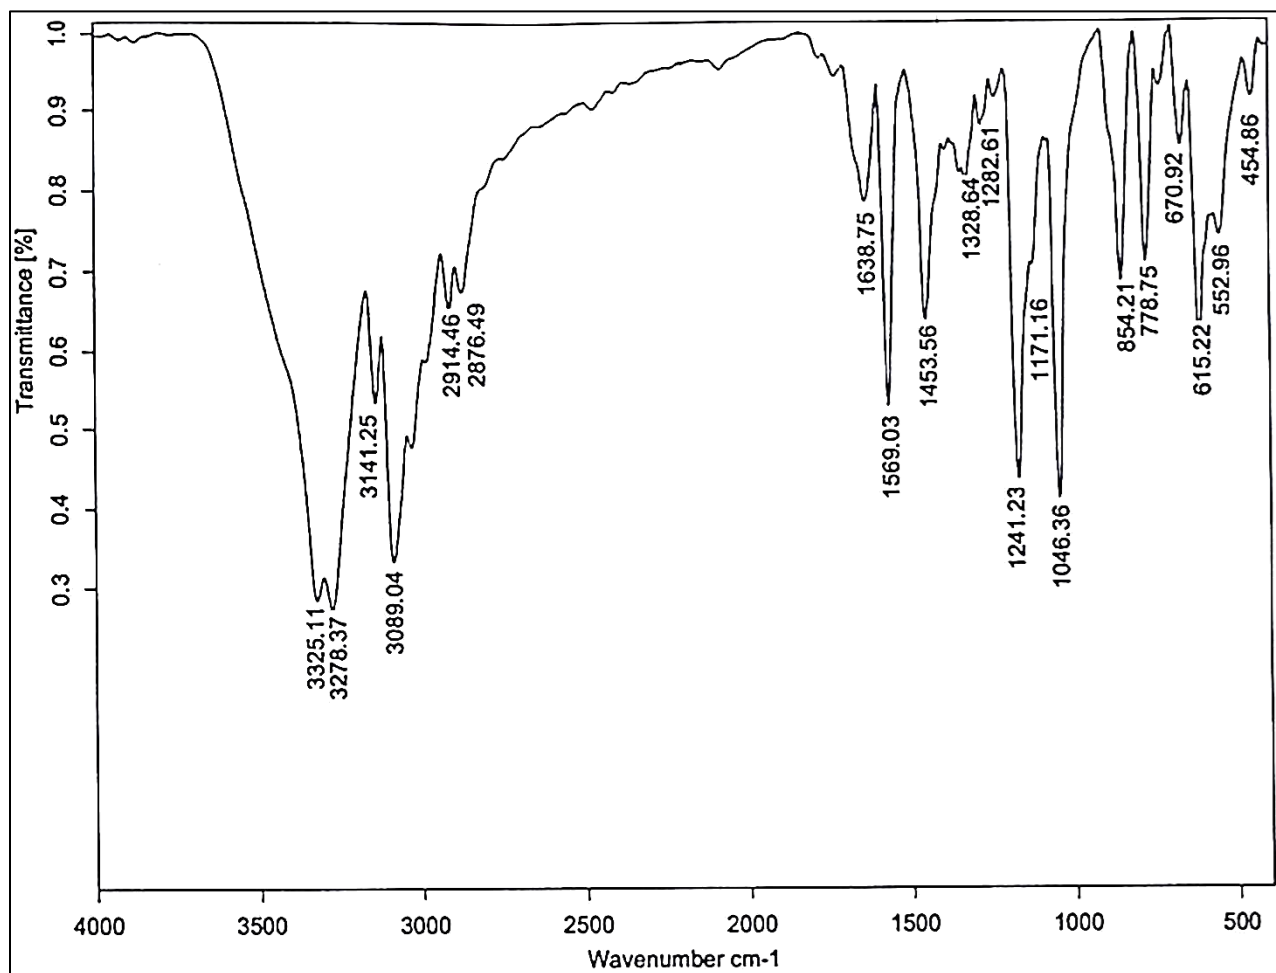

**Figure S1.** FT-IR spectrum of compound **1a**.

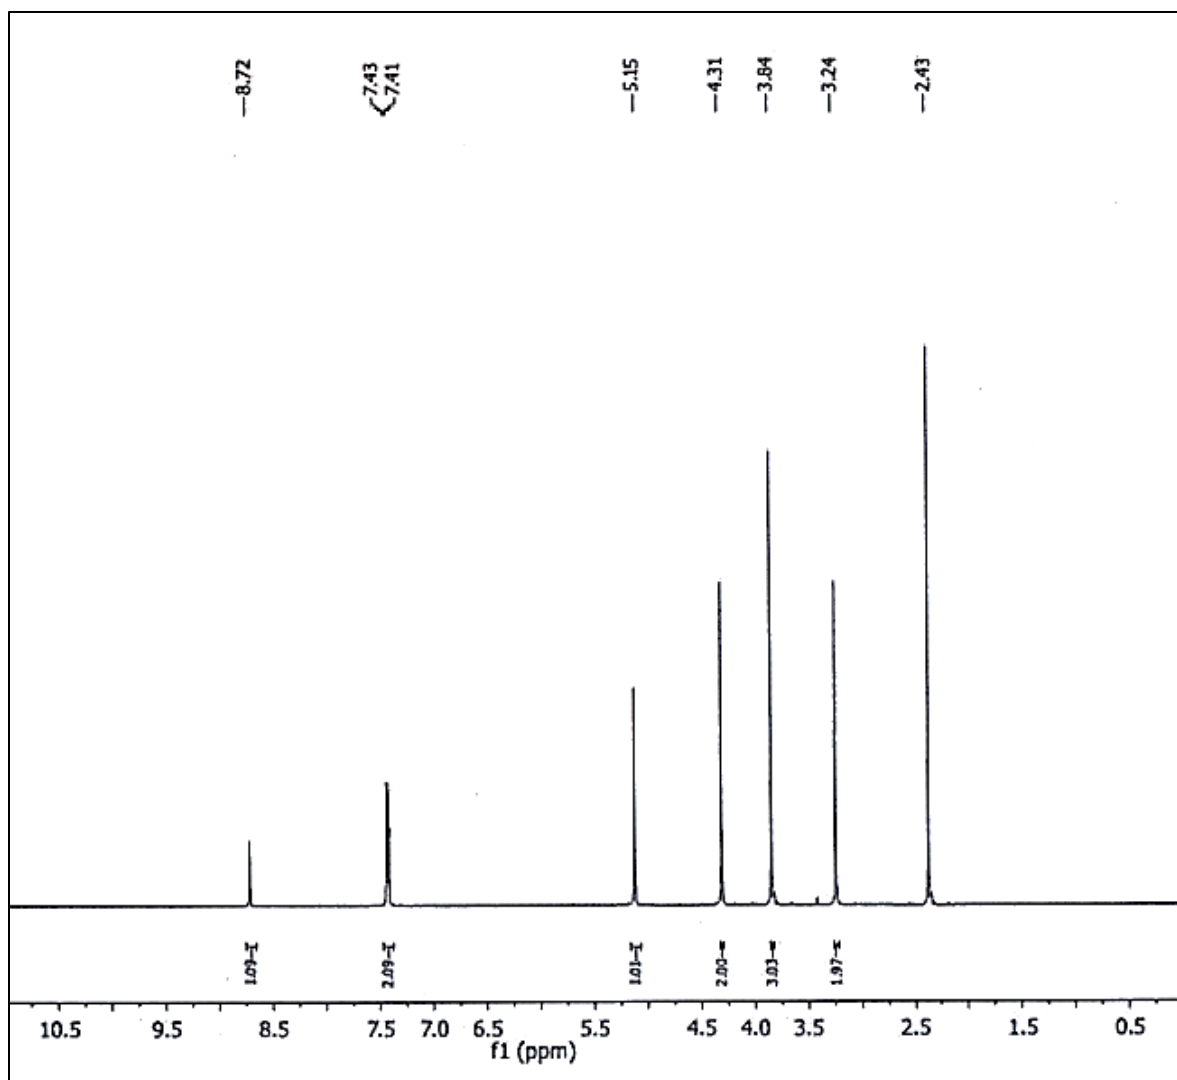

**Figure S2.**  $^1\text{H-NMR}$  spectrum of compound **1a** (500 MHz,  $\text{DMSO-d}_6$ ).

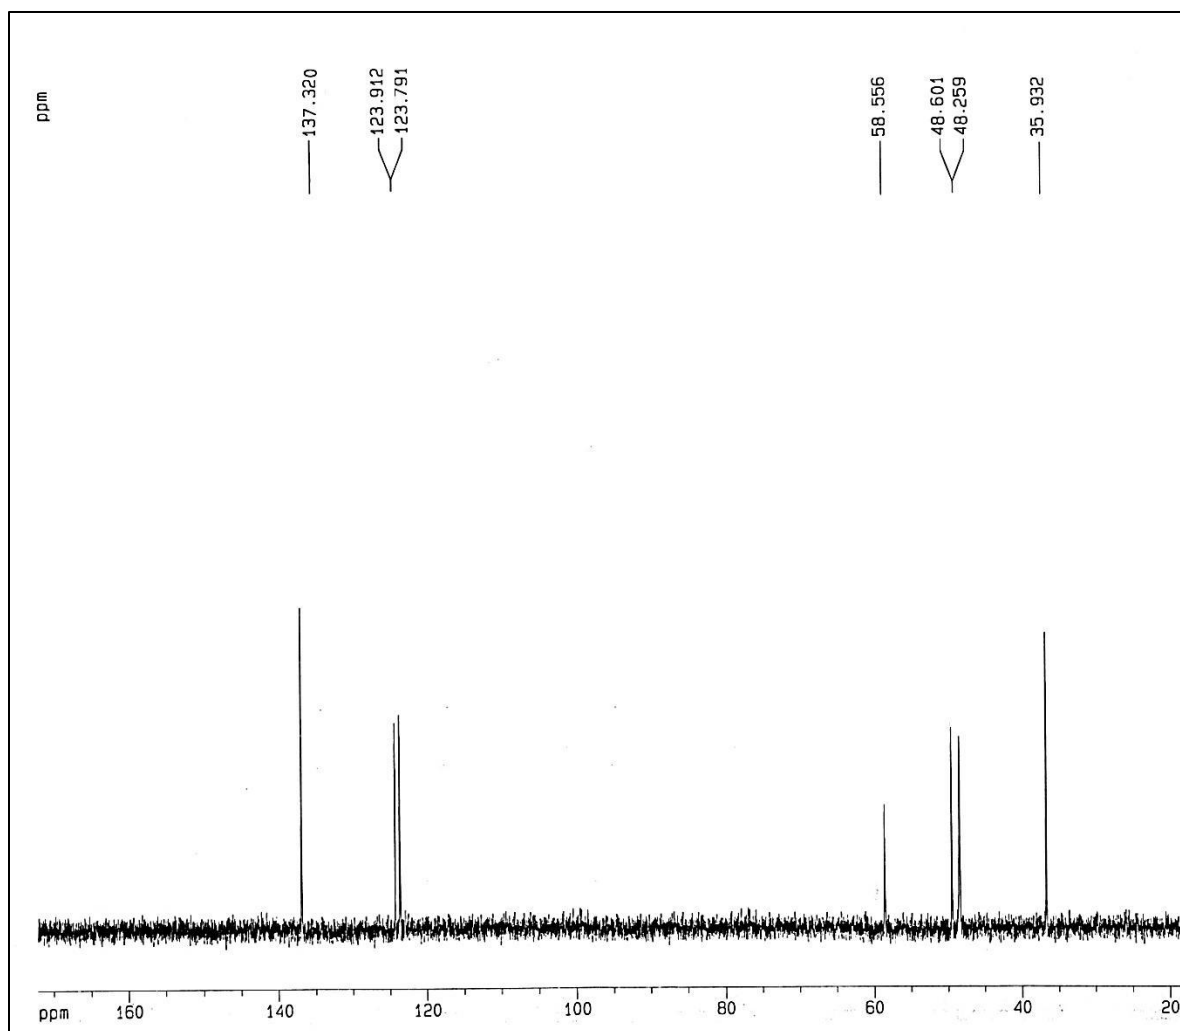

**Figure S3.**  $^{13}\text{C}$ -NMR spectrum of compound **1a** (500 MHz,  $\text{D}_2\text{O}$ ).

2) FT-IR,  $^1\text{H}$ NMR,  $^{13}\text{C}$ -NMR spectra for 2,2-Bis(1-(1-methylimidazolium)methylpropane-1,3-diol dicyanamide  $[\text{mim}_2\text{C}_3(\text{C}_1\text{OH})_2][\text{DCA}]_2$  (**1b**)

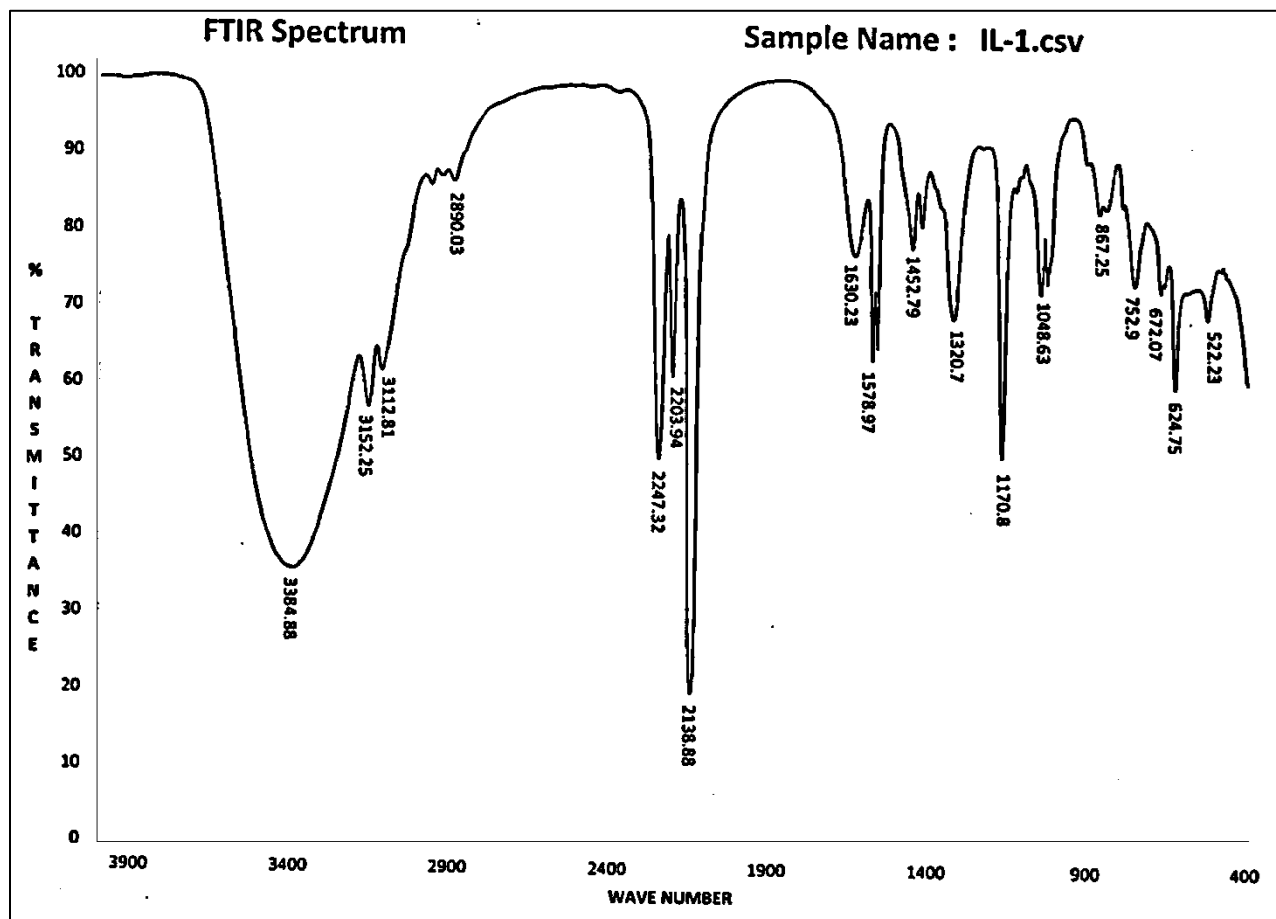

Figure S4. FT-IR spectrum of compound **1b**.

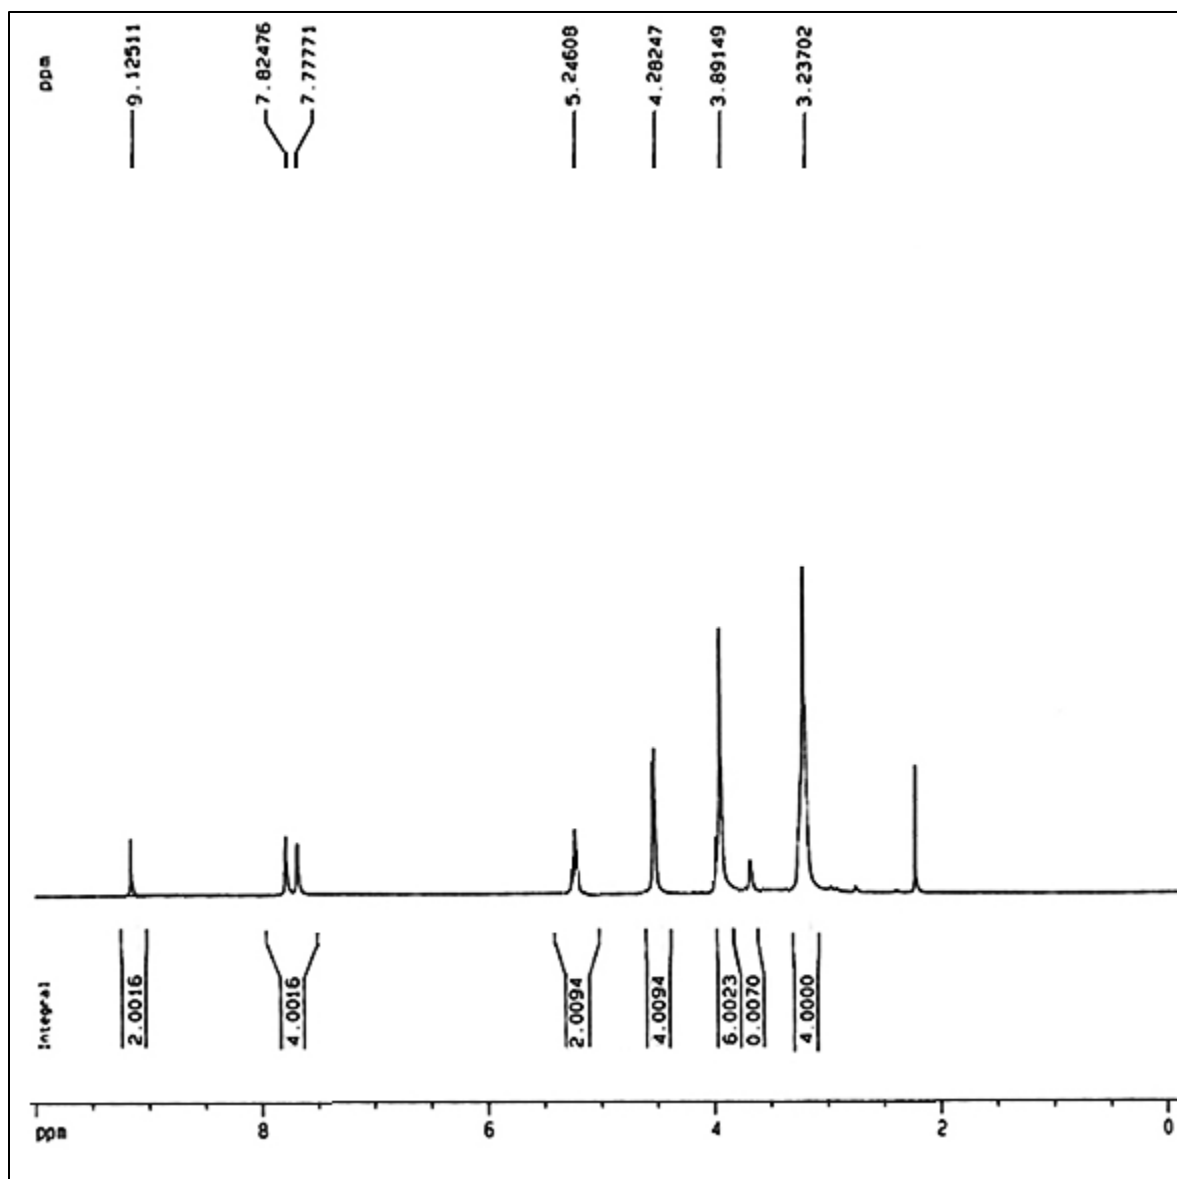

**Figure S5.** <sup>1</sup>H-NMR spectrum of compound **1b** (500 MHz, DMSO-d<sub>6</sub>).

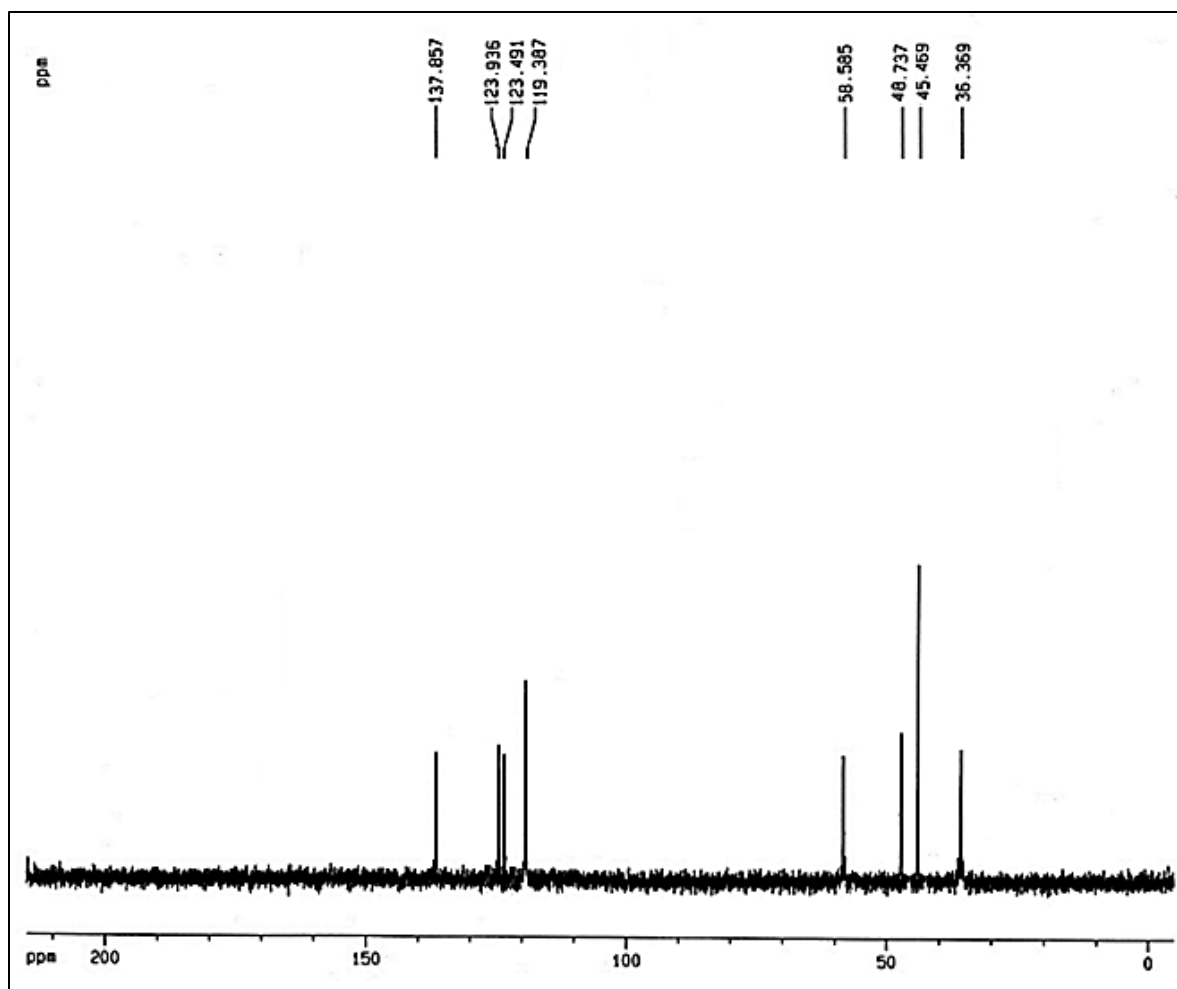

**Figure S6.**  $^{13}\text{C}$ -NMR spectrum of compound **1b** (500 MHz,  $\text{D}_2\text{O}$ ).

3) FT-IR,  $^1\text{H}$ NMR,  $^{13}\text{C}$ -NMR spectrums for 2,2-Bis(1-(1-vinylimidazolium)methylpropane-1,3-diol bromide [vim<sub>2</sub>C<sub>3</sub>(C<sub>1</sub>OH)<sub>2</sub>][Br]<sub>2</sub> (**2a**).

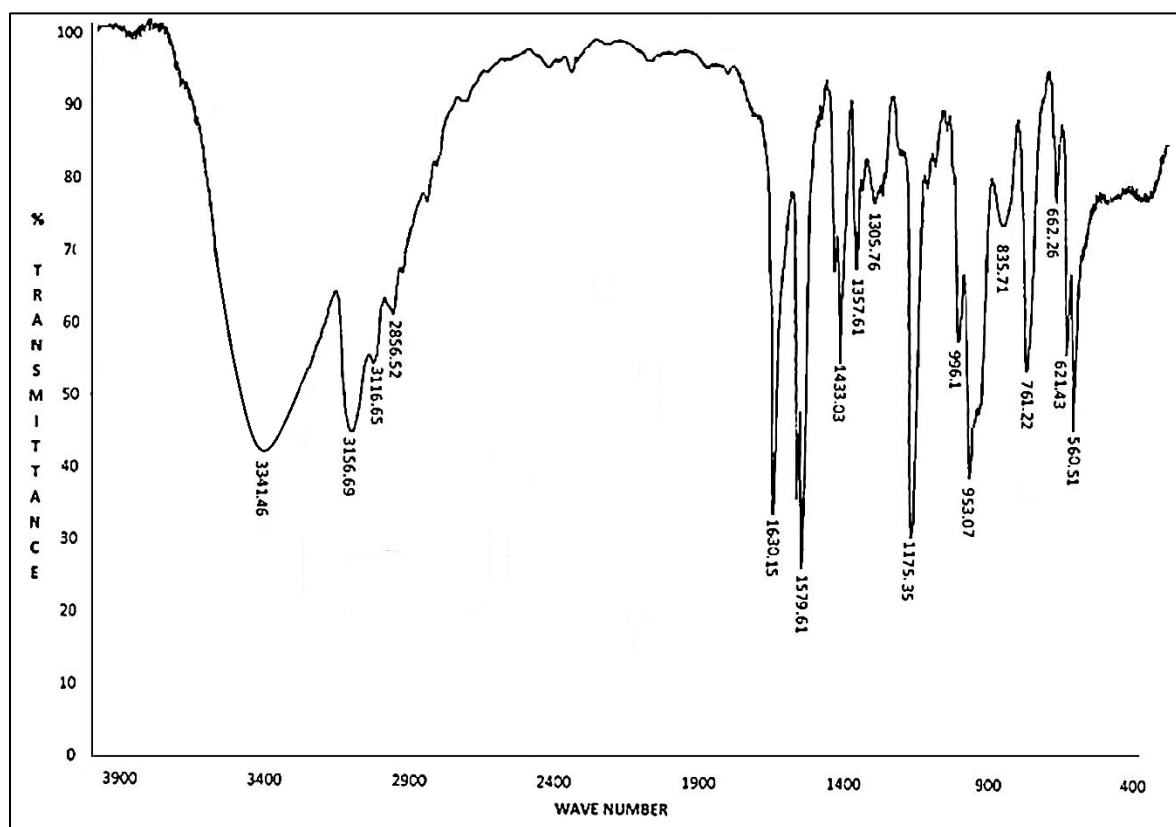

**Figure S7.** FT-IR spectrum of compound **2a**.



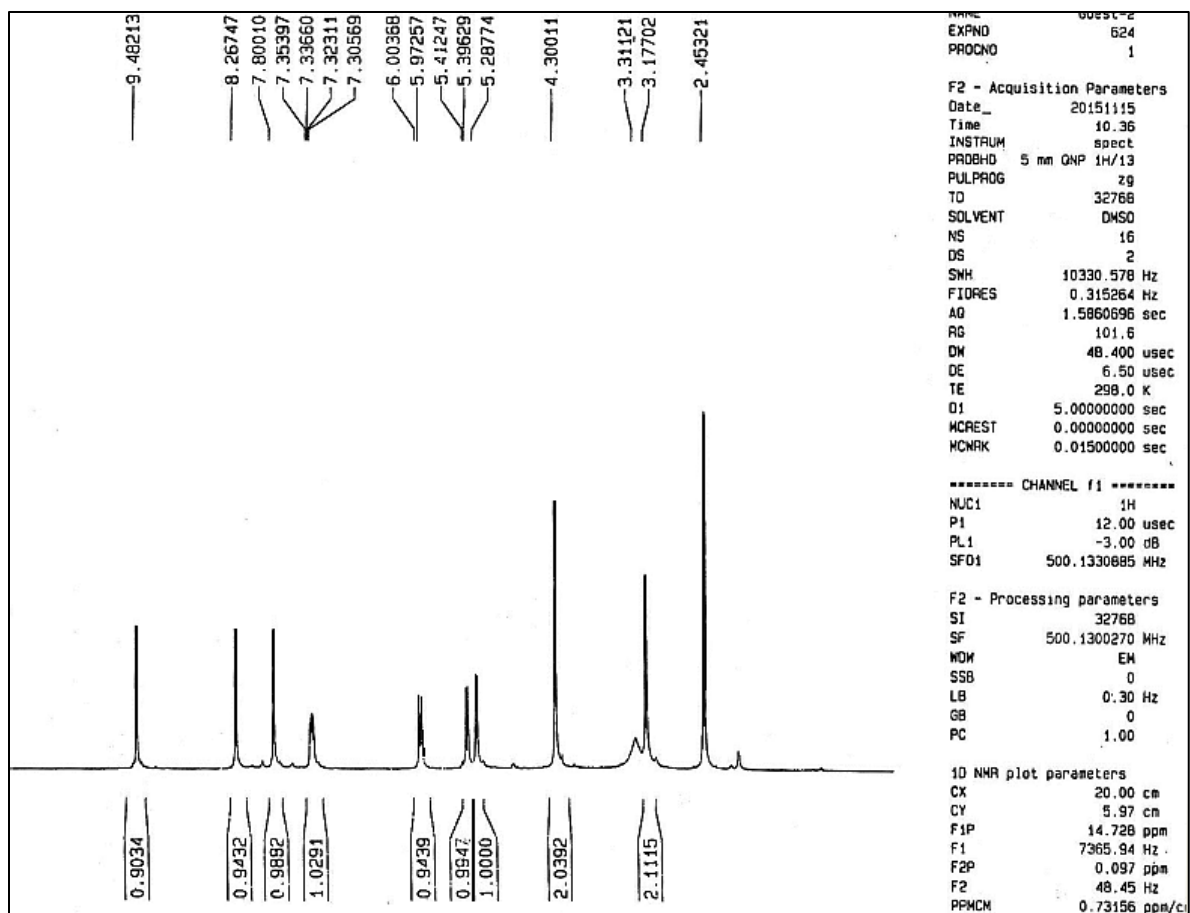

**Figure S8.**  $^1\text{H}$ -NMR spectrum of compound **2a** (500 MHz,  $\text{DMSO-d}_6$ ).

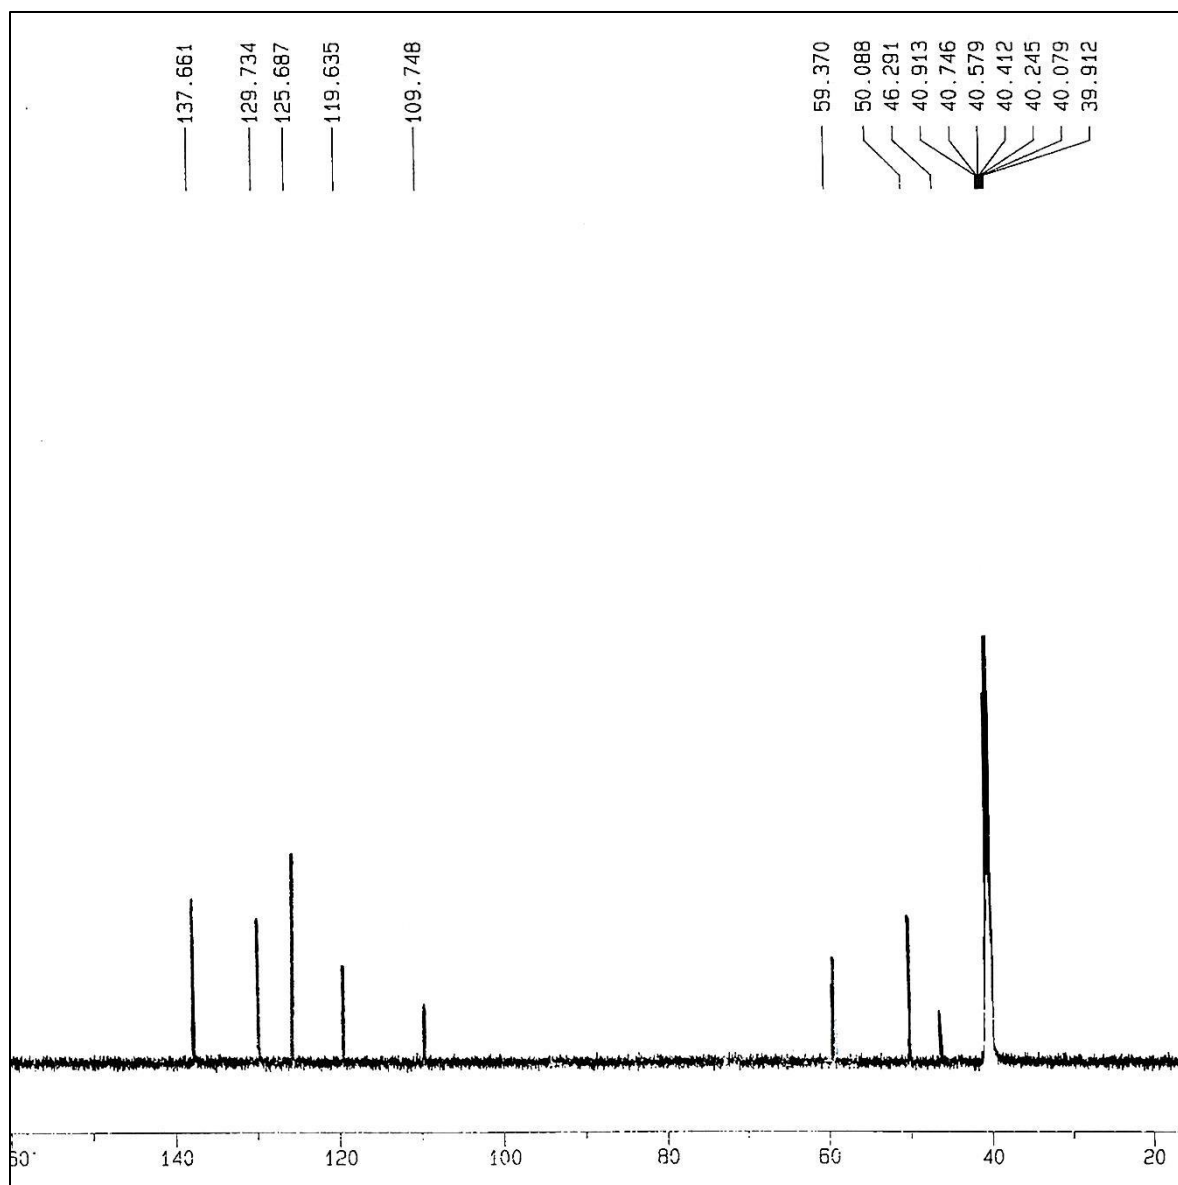

**Figure S9.**  $^{13}\text{C}$ -NMR spectrum of compound **2a** (500 MHz,  $\text{DMSO-d}_6$ ).

4) FT-IR,  $^1\text{H}$ NMR,  $^{13}\text{C}$ -NMR spectrums for 2,2-Bis(1-(1-vinylimidazolium)methylpropane-1,3-diol dicyanamide  $[\text{vim}_2\text{C}_3(\text{C}_1\text{OH})_2][\text{DCA}]_2$  (**2b**):.

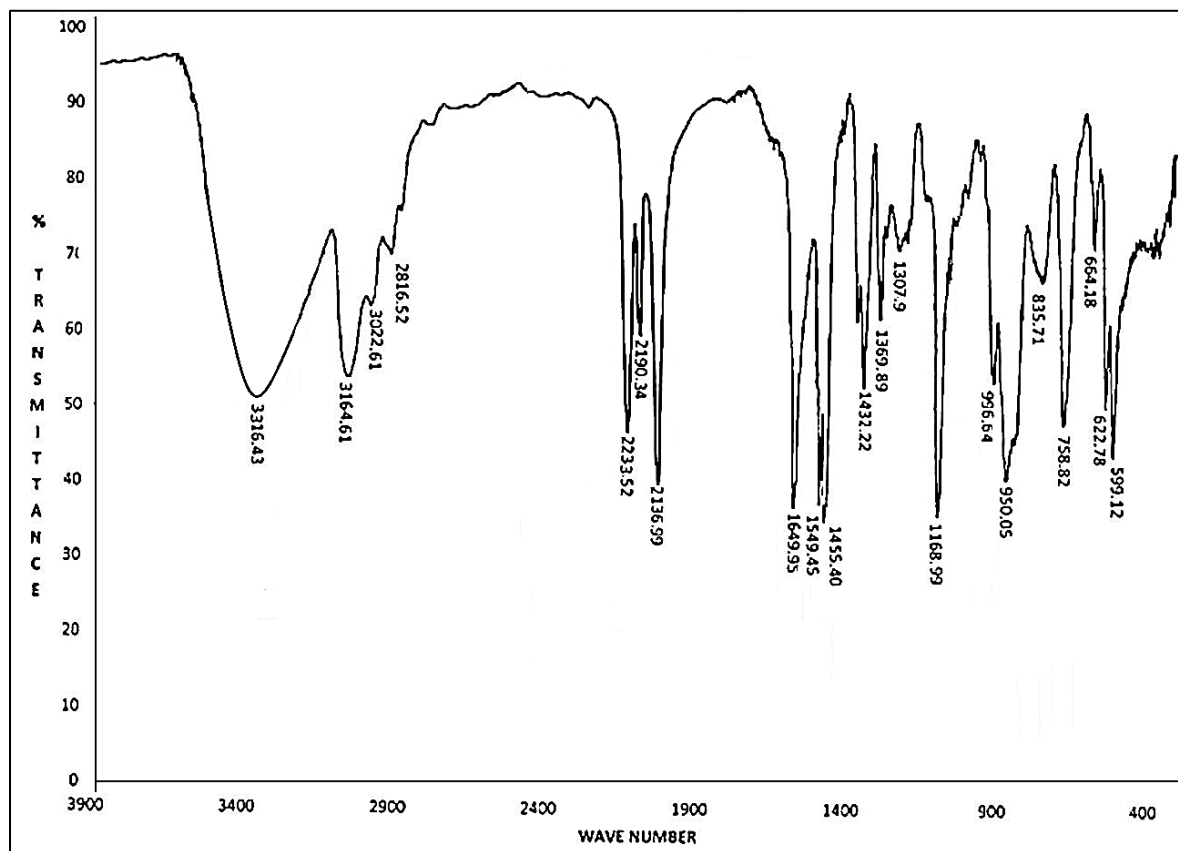

**Figure S10.** FT-IR spectrum of compound **2b**.

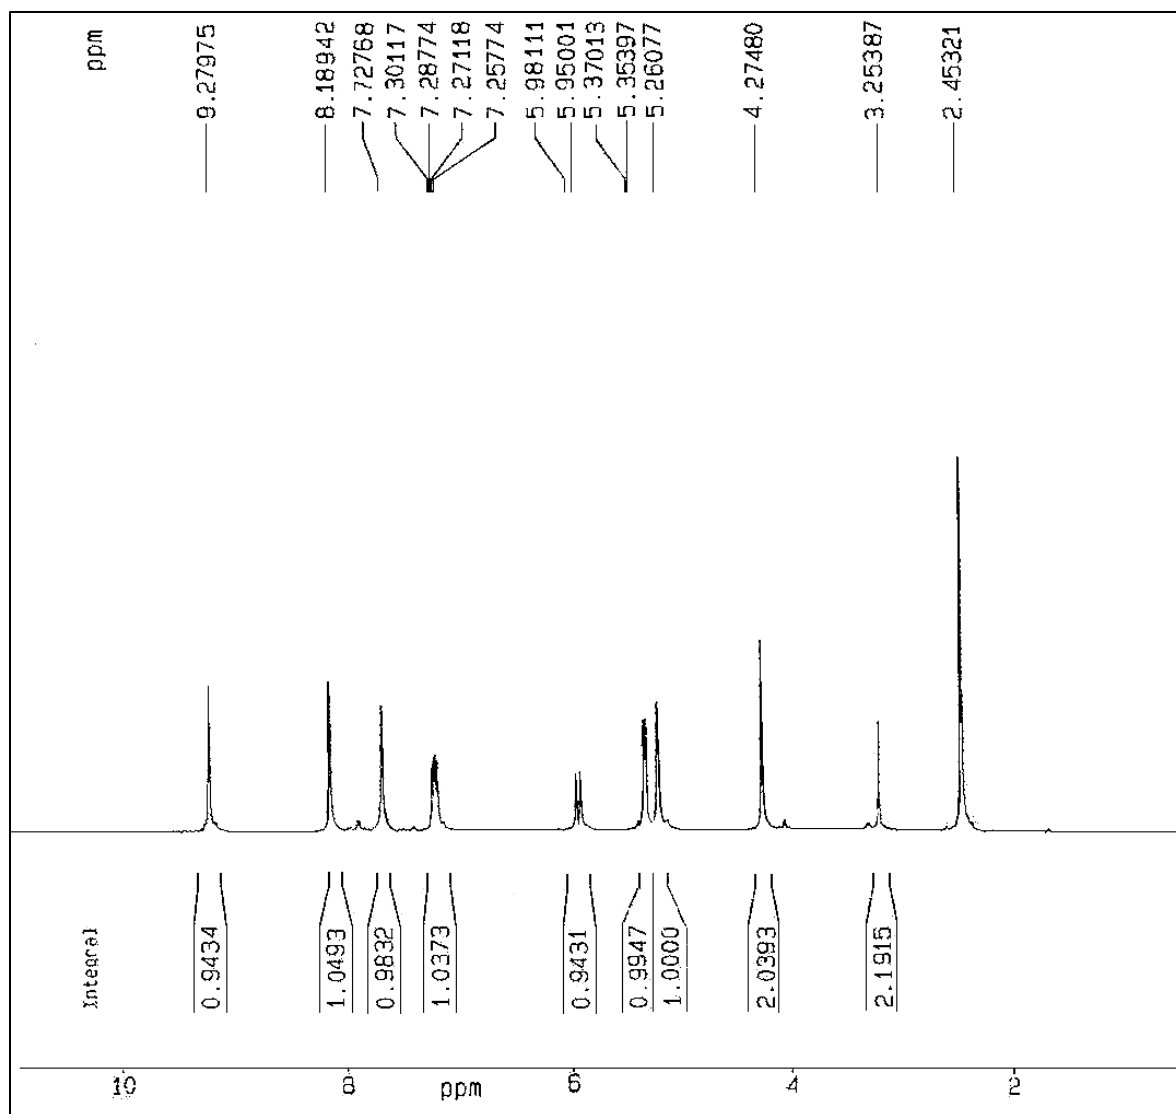

**Figure S11.** <sup>1</sup>H-NMR spectrum of compound **2b** (500 MHz, DMSO-d<sub>6</sub>).

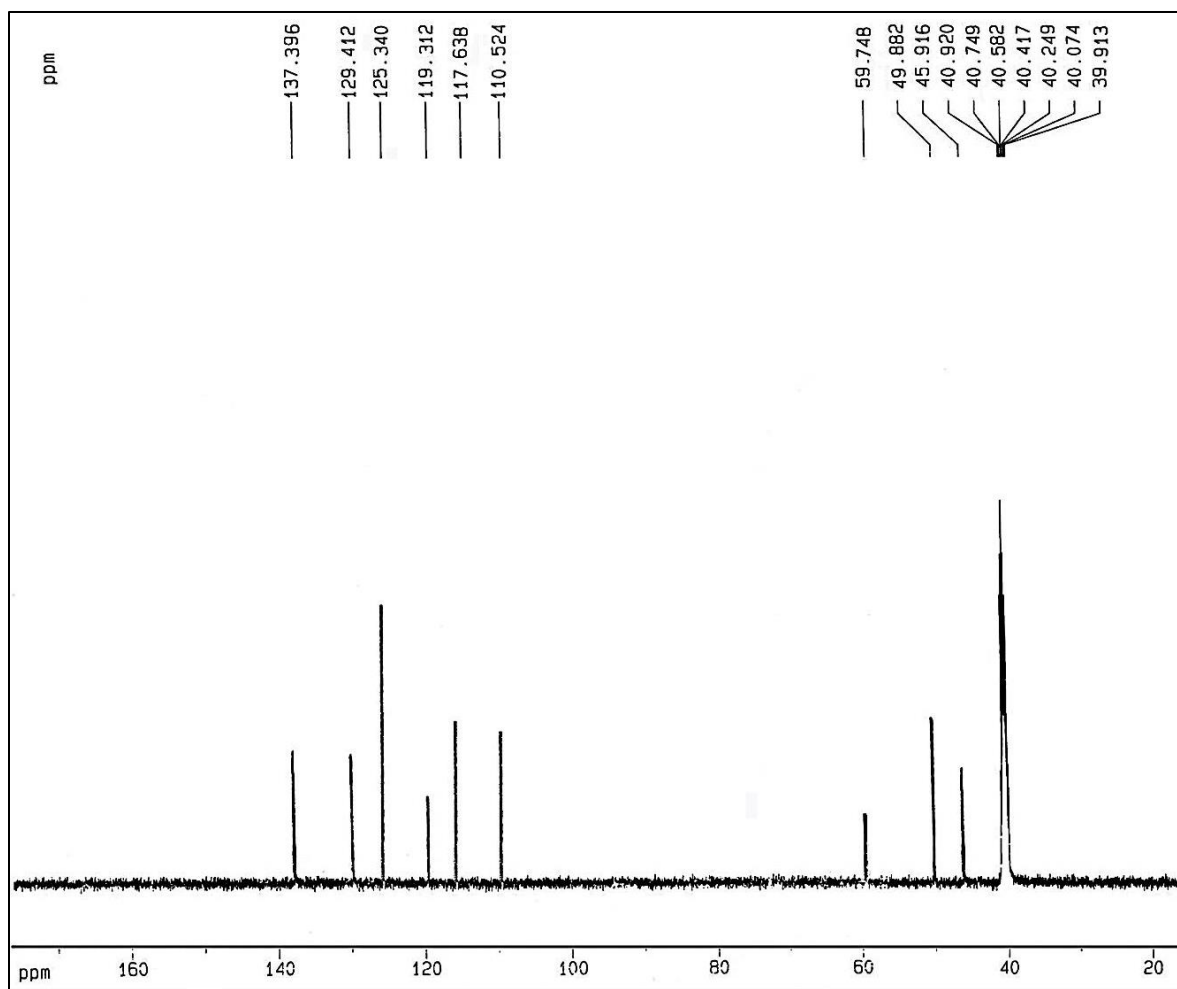

**Figure S12.**  $^{13}\text{C}$ -NMR spectrum of compound **2b** (500 MHz,  $\text{DMSO-d}_6$ ).

5) FT-IR,  $^1\text{H-NMR}$ ,  $^{13}\text{C-NMR}$  spectrums for 1,3-bis(3-methylimidazolium-1-yl)propane bromide  $[\text{mim}_2\text{C}_3][\text{Br}]_2$  (**3a**)

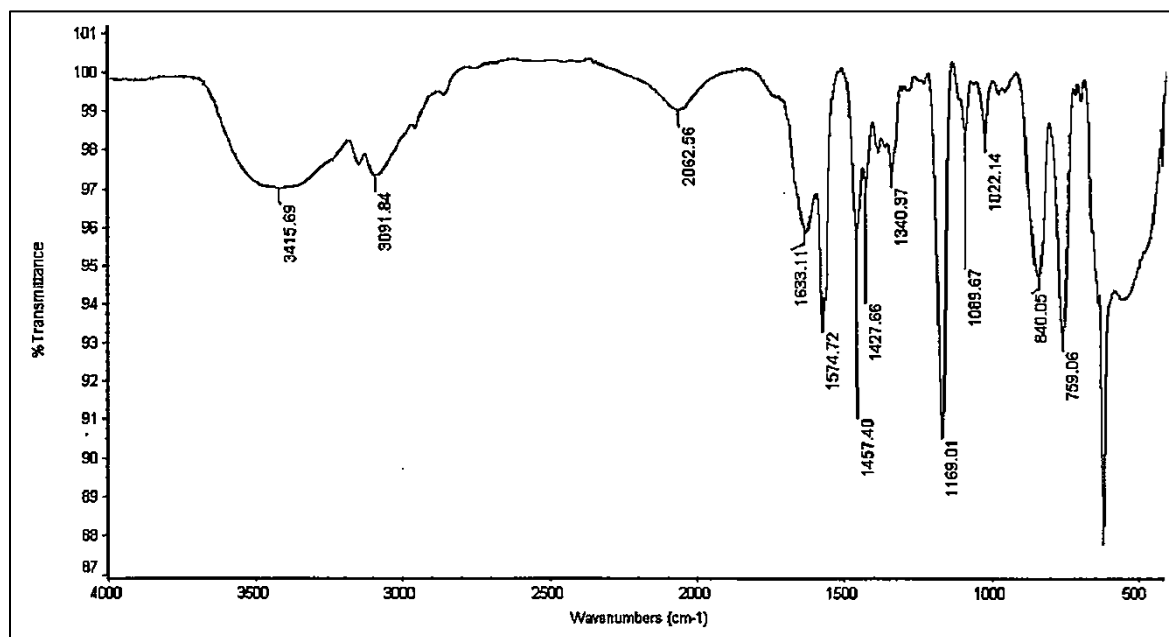

**Figure S13.** FT-IR spectrum of compound **3a**.

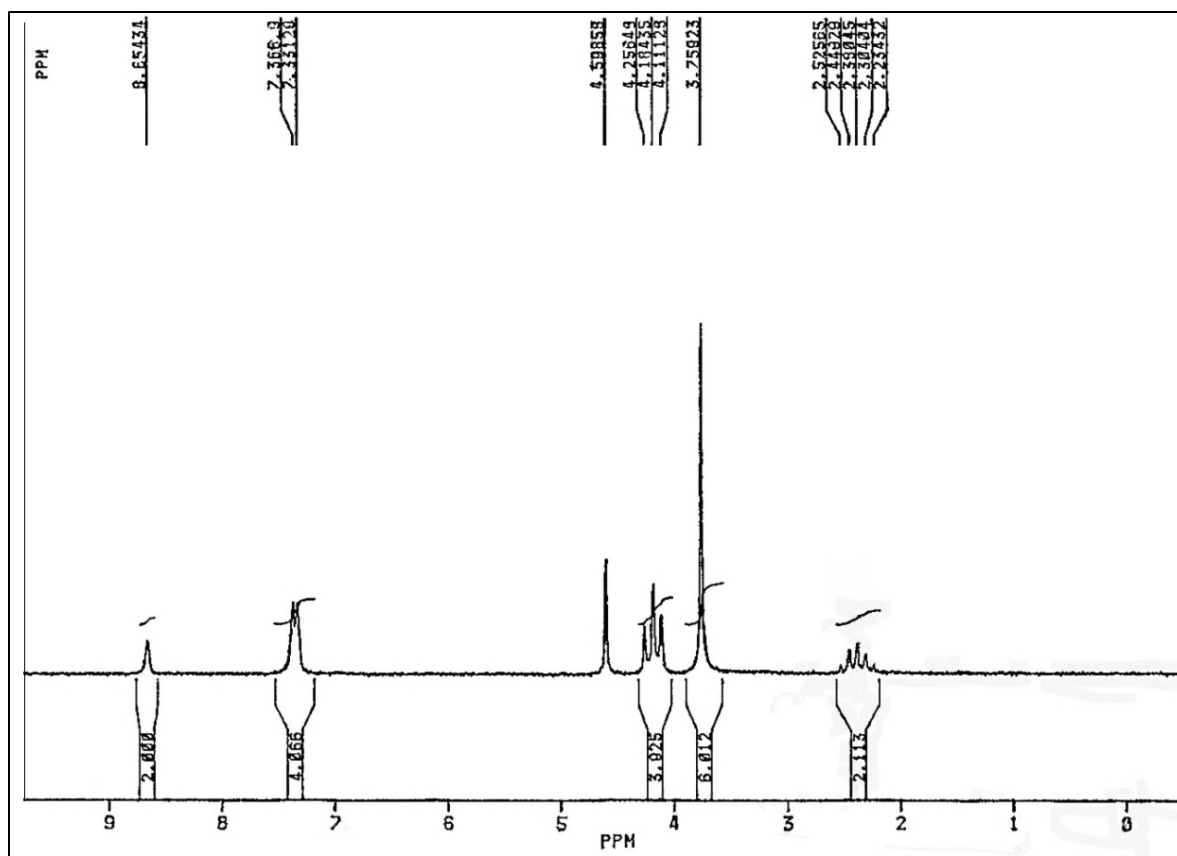

**Figure S14.** <sup>1</sup>H-NMR spectrum of compound **3a** (500 MHz, D<sub>2</sub>O).

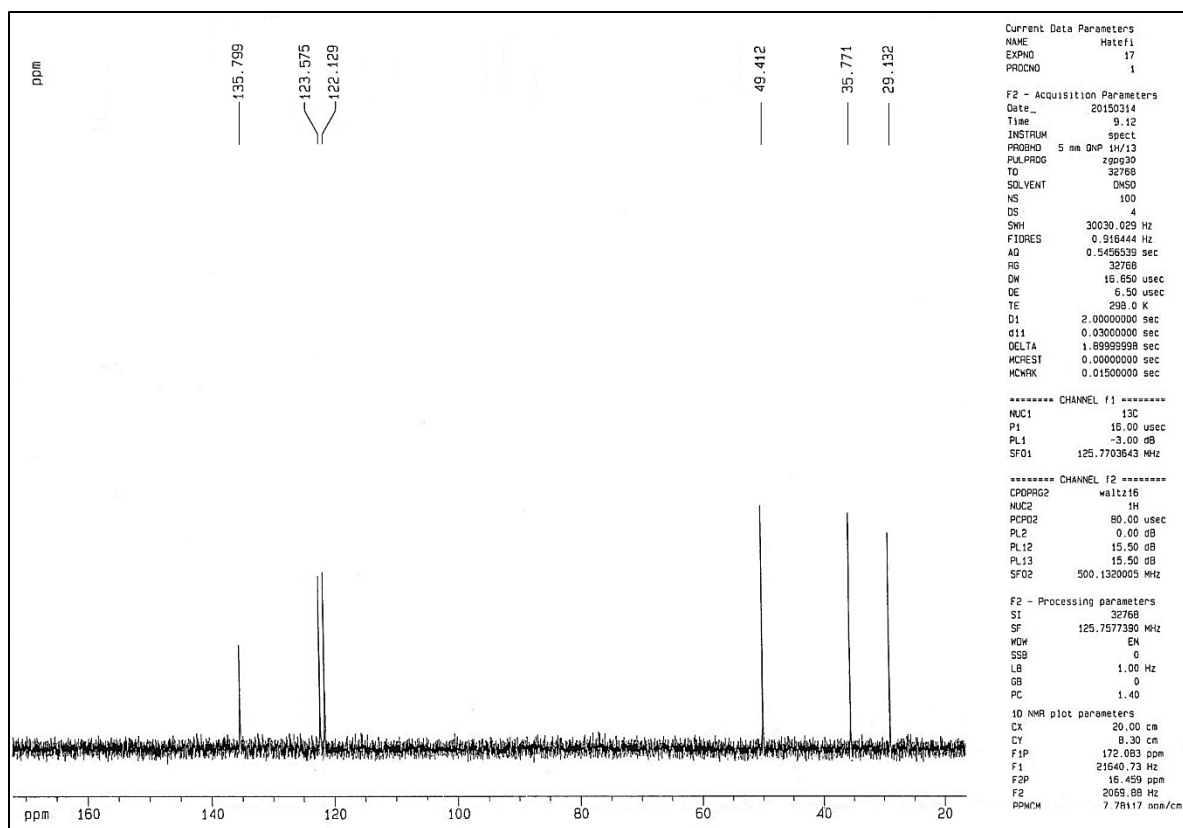

**Figure S15.**  $^{13}\text{C}$ -NMR spectrum of compound **3a** (500 MHz,  $\text{D}_2\text{O}$ ).



6) FT-IR,  $^1\text{H}$ NMR,  $^{13}\text{C}$ -NMR spectrums for 1,3-bis(3-methylimidazolium-1-yl)propane bromide [ $\text{mim}_2\text{C}_3$ ][DCA] $_2$  (**3b**)

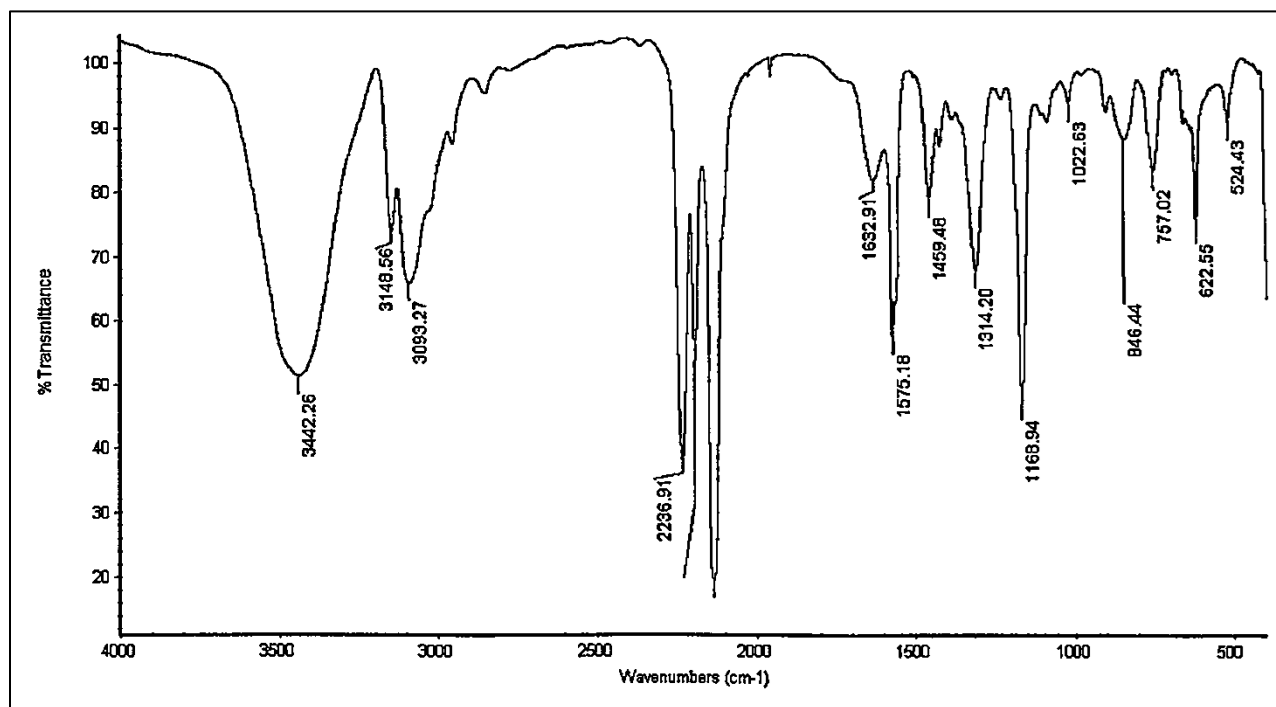

**Figure S16.** FT-IR spectrum of compound **3b**.

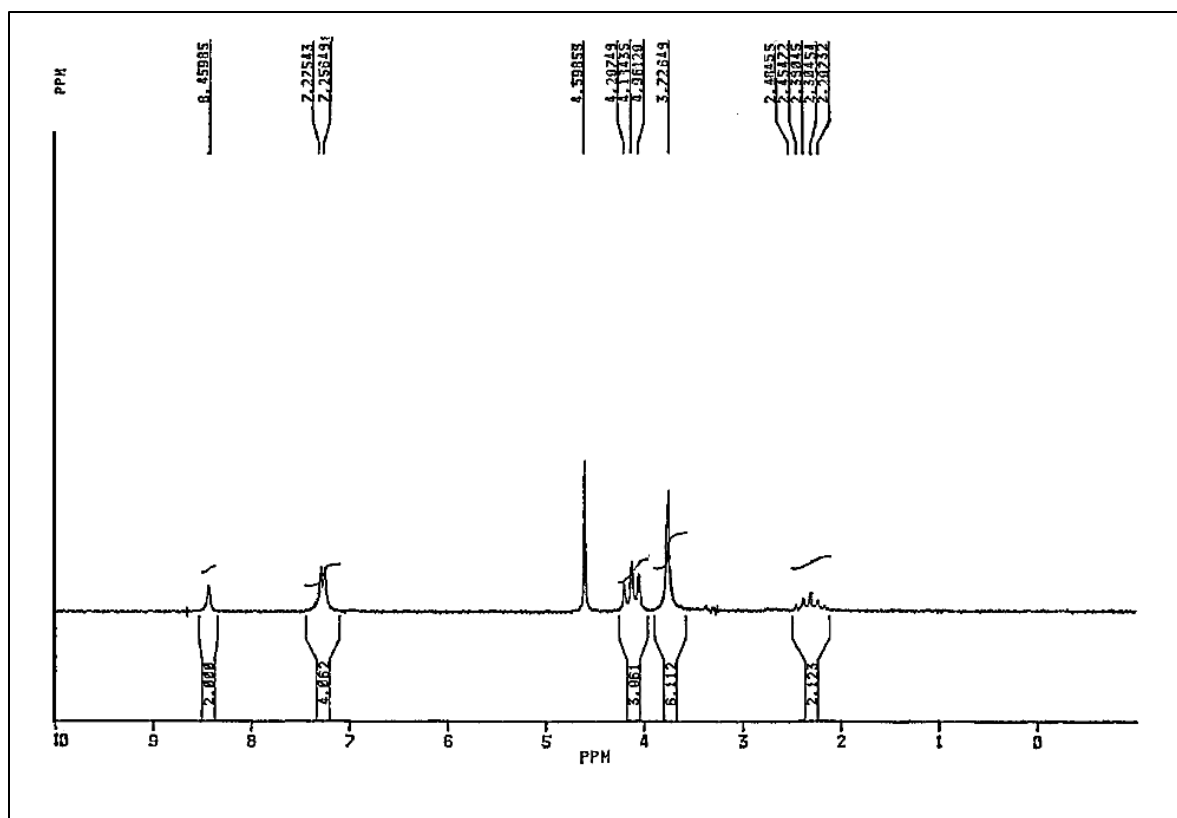

**Figure S17.** <sup>1</sup>H-NMR spectrum of compound **3b** (500 MHz, D<sub>2</sub>O).

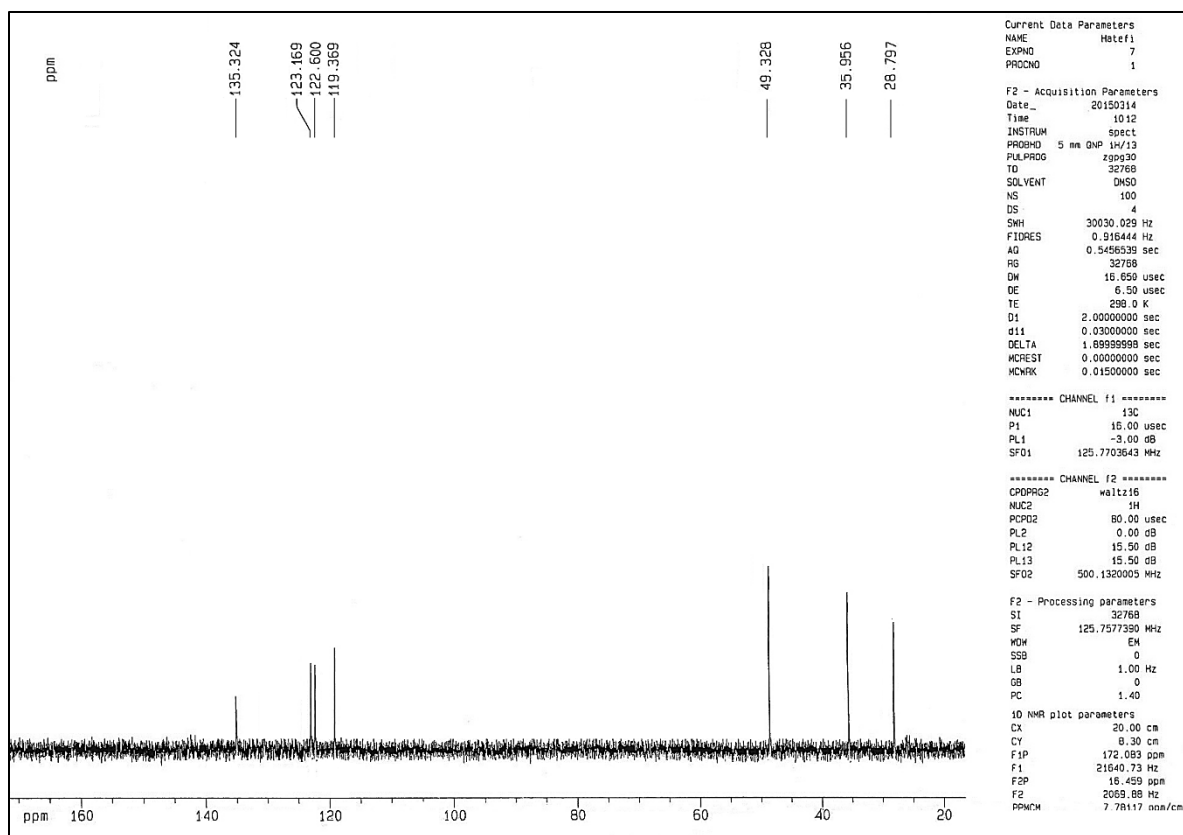

**Figure S18.**  $^{13}\text{C}$ -NMR spectrum of compound **3b** (500 MHz,  $\text{D}_2\text{O}$ ).

**Table S1.** Heat capacities of the synthesized dicationic ILs as a function of temperature

| Temperature<br>(K) | [mim <sub>2</sub> C <sub>3</sub> (C <sub>1</sub> OH) <sub>2</sub> ]DCA <sub>2</sub> |                                      | [vim <sub>2</sub> C <sub>3</sub> (C <sub>1</sub> OH) <sub>2</sub> ]DCA <sub>2</sub> |                                      | [mim <sub>2</sub> C <sub>3</sub> ]DCA <sub>2</sub> |                                      |
|--------------------|-------------------------------------------------------------------------------------|--------------------------------------|-------------------------------------------------------------------------------------|--------------------------------------|----------------------------------------------------|--------------------------------------|
|                    | J.g <sup>-1</sup> .k <sup>-1</sup>                                                  | J.mol <sup>-1</sup> .k <sup>-1</sup> | J.g <sup>-1</sup> .k <sup>-1</sup>                                                  | J.mol <sup>-1</sup> .k <sup>-1</sup> | J.g <sup>-1</sup> .k <sup>-1</sup>                 | J.mol <sup>-1</sup> .k <sup>-1</sup> |
| 303                | 1.4                                                                                 | 557.85                               | 1.58                                                                                | 667.47                               | 1.21                                               | 409.44                               |
| 308                | 1.42                                                                                | 565.77                               | 1.60                                                                                | 675.92                               | 1.23                                               | 416.21                               |
| 313                | 1.45                                                                                | 577.72                               | 1.62                                                                                | 684.37                               | 1.27                                               | 429.74                               |
| 318                | 1.47                                                                                | 585.69                               | 1.64                                                                                | 688.59                               | 1.30                                               | 439.89                               |
| 323                | 1.49                                                                                | 593.66                               | 1.65                                                                                | 697.04                               | 1.32                                               | 446.66                               |
| 328                | 1.51                                                                                | 601.63                               | 1.67                                                                                | 705.49                               | 1.35                                               | 456.81                               |
| 333                | 1.52                                                                                | 605.61                               | 1.69                                                                                | 713.94                               | 1.38                                               | 466.96                               |
| 338                | 1.54                                                                                | 613.58                               | 1.71                                                                                | 722.39                               | 1.41                                               | 477.12                               |
| 343                | 1.55                                                                                | 617.57                               | 1.72                                                                                | 726.61                               | 1.43                                               | 483.88                               |
| 348                | 1.57                                                                                | 625.54                               | 1.74                                                                                | 735.06                               | 1.45                                               | 490.65                               |
| 353                | 1.59                                                                                | 633.50                               | 1.76                                                                                | 743.51                               | 1.48                                               | 500.80                               |
| 358                | 1.61                                                                                | 641.47                               | 1.78                                                                                | 751.96                               | 1.50                                               | 507.57                               |
| 363                | 1.62                                                                                | 645.46                               | 1.80                                                                                | 760.41                               | 1.53                                               | 517.72                               |
| 368                | 1.64                                                                                | 653.42                               | 1.82                                                                                | 768.86                               | 1.56                                               | 527.87                               |
| 373                | 1.66                                                                                | 661.39                               | 1.84                                                                                | 777.31                               | 1.59                                               | 538.02                               |
| 378                | 1.68                                                                                | 669.36                               | 1.85                                                                                | 781.53                               | 1.61                                               | 544.79                               |
| 383                | 1.7                                                                                 | 677.33                               | 1.87                                                                                | 789.98                               | 1.65                                               | 558.33                               |
| 388                | 1.71                                                                                | 681.32                               | 1.89                                                                                | 798.43                               | 1.68                                               | 568.48                               |
| 393                | 1.73                                                                                | 689.28                               | 1.91                                                                                | 806.88                               | 1.71                                               | 578.63                               |
